# Supplementary material
Source: publisher figshare collection journal article supplement (https://gsajournals.figshare.com/ndownloader/files/23153594)
Supplement: Supplementary file 1 [file 23153594]

| **Table S5: Oligonucleotides used in this study** | |
| --- | --- |
| Oligo Name | Oligo Sequence |
| AC #27 | CCCAATCCTAGAATCCCGTCG |
| AC #21 | TAAAAGAGCTGCTGTCGCACG |
| LL #148 | CCGTCGACAGAAGATGATATTGAAGGAGC |
| LL #149 | AATTAACCCTCACTAAAGGGAACAAAAGC |
| hph300 | TAAAGGGAGGAAGGGCGAAC |
| set7 geno F | GCATGTCCAGGGGCAGTC |
| set7 geno R | GCATGTCCAGGGGCAGTC |
| AC #24 | GAACAAGCCGATTGCTGTCC |
| AC #23 | TGTATAGAACGCTGCCAAGGA |
| MK Primer 51 | GGCGGAGGCGGCGCGATGCAAATTTGTCGGGACCG |
| MK Primer 52 | TTAATTAATGGCGCGTTACTTCCCCCACCGCTGAA |
| LL 155 | TCGCCTCGCTCCAGTCAATGACC |
| LL 466 | TGTGGGCGATTTGAGCGTGC |
| SH1577 | CGGAAAGGGCAAGTCGTCTG |
| SH1578 | CCTCCGCCTCCGCCTCCGCCGCCTCCGCCAGCCTCCTGAGCCTTGGCCT |
| SH1579 | TGCTATACGAAGTTATGGATCCGAGCTCGCTGCACCGAAAAACTCGACG |
| SH1580 | GTGACGAGGGGAGATTGCTC |
